# Supplementary material
Source: publisher site journal article supplement (https://bdj.pensoft.net/article/download/suppl/8104089/)

# Real example of a herbarium collection disambiguation process

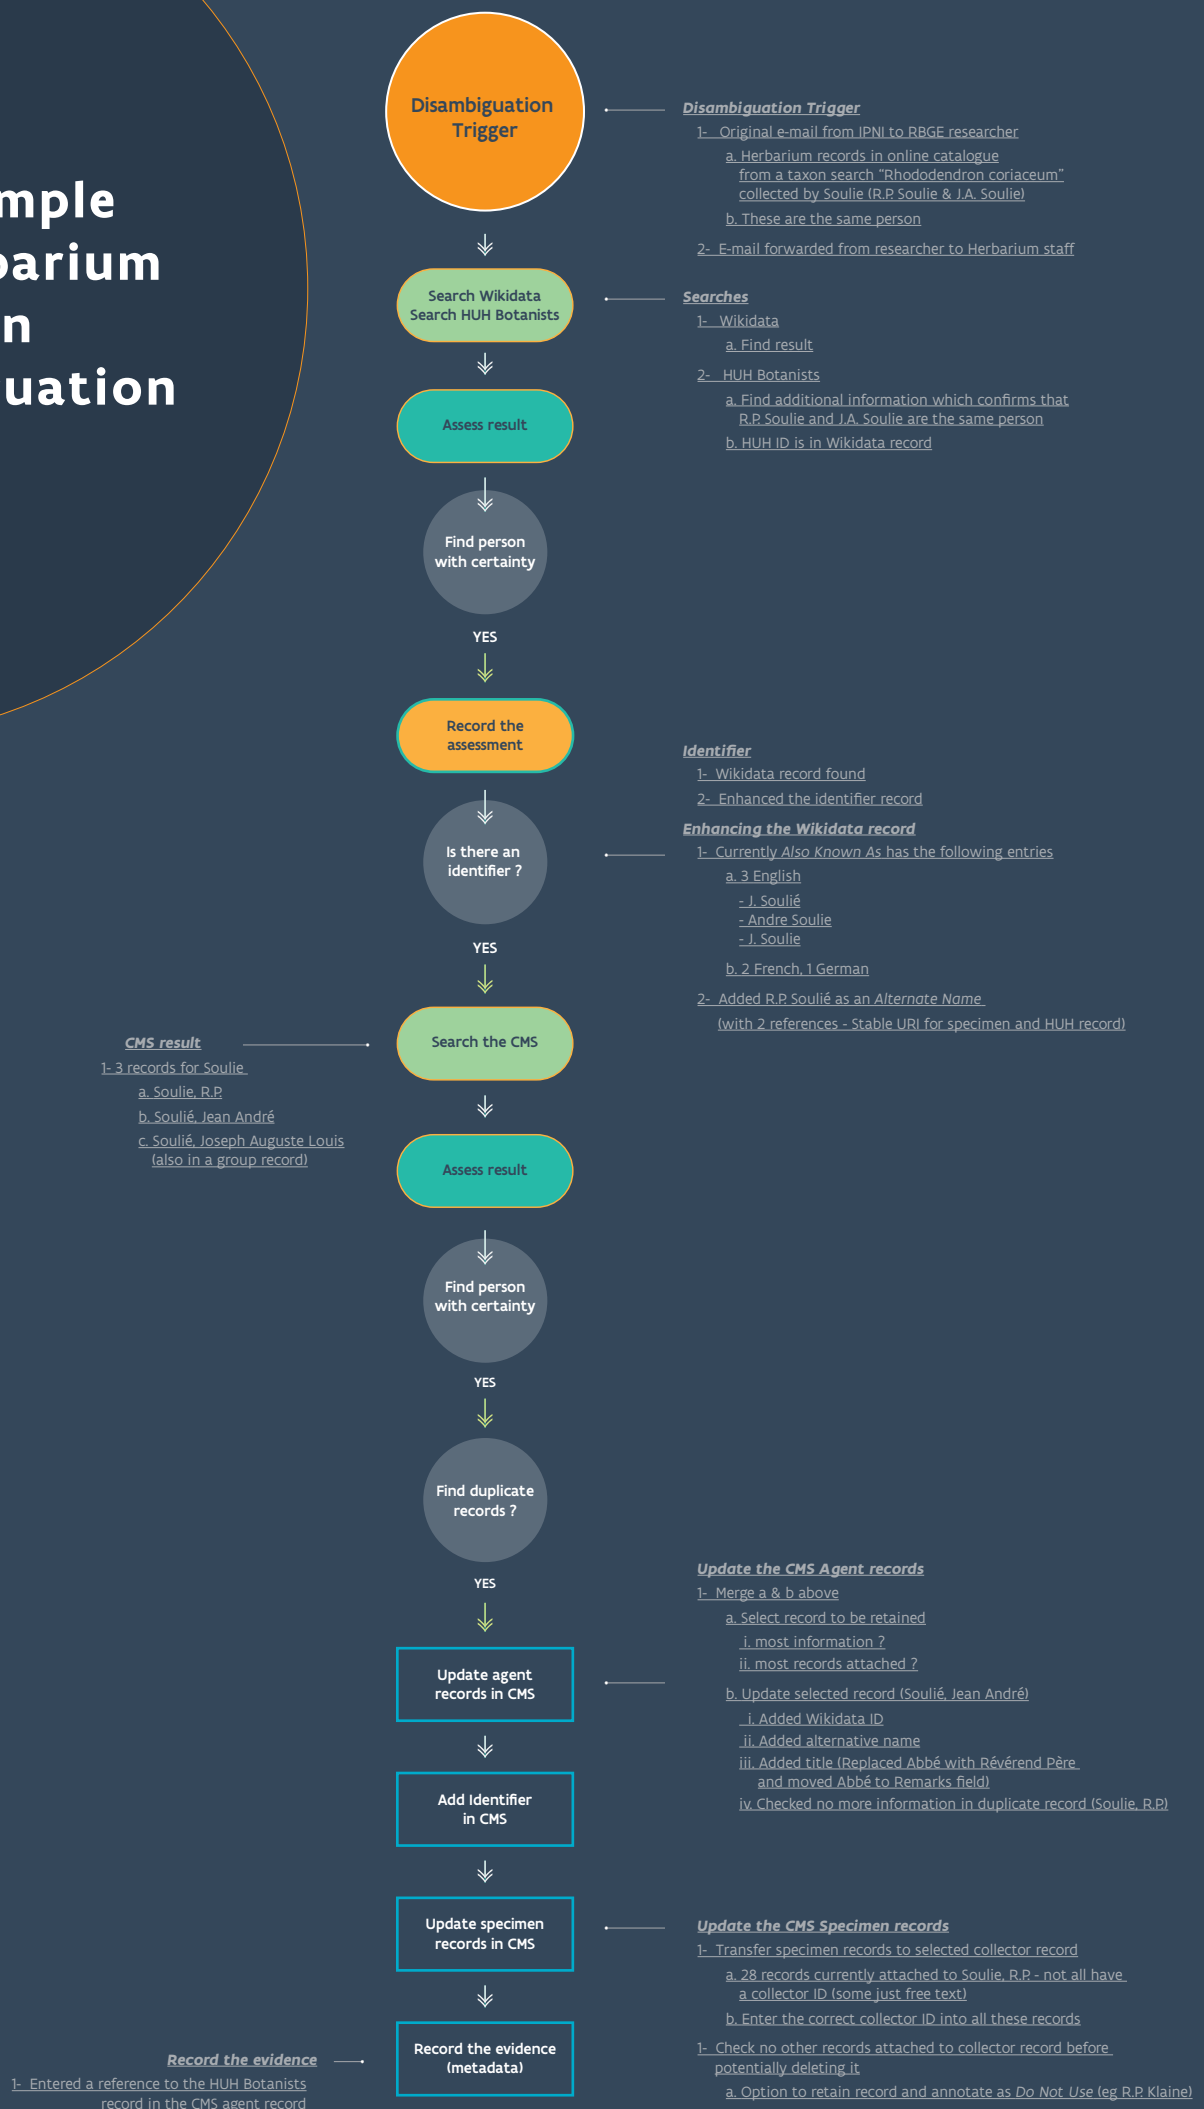

Supplement: Supplementary file
